# Supplementary material
Source: Research Square preprint supplement (doi:10.21203/rs.3.rs-8869851/v1)
Supplement: Supplementary file 1 [file b510c9580e97f028a6f64758.docx]

**Supplementary Information for**

**“Octahedral Motif-Guided Design of Optoelectronic Semiconductors via Interpretable Machine Learning”**

Xiaoyu Yang1#, Wenyue Zhao2,3#, Xin He1, Weidong Fei4, Yuanhui Sun5*, Yu Zhao2,3,6*, Lijun Zhang1*

1State Key Laboratory of Integrated Optoelectronics, Key Laboratory of Automobile Materials of MOE and College of Materials Science and Engineering, Jilin University, Changchun, China

2School of Physics, Harbin Institute of Technology, Harbin, China

3Laboratory for Space Environment and Physical Sciences, Harbin Institute of Technology, Harbin, China

4School of Materials Science and Engineering, Harbin Institute of Technology, Harbin, China

5Suzhou Laboratory, Suzhou, China

6Frontier Science Center for Interaction between Space Environment and Matter, Harbin Institute of Technology, Harbin, China

#These authors contributed equally.

*Corresponding author email address: [sunyh@szlab.ac.cn](mailto:sunyh@szlab.ac.cn); [yuzhao@hit.edu.cn](mailto:yuzhao@hit.edu.cn); [lijun_zhang@jlu.edu.cn](mailto:lijun_zhang@jlu.edu.cn)

**Contents**

[1. Octahedral identification method 3](#_Toc217311881)

[2. Components and connectivity of dataset 4](#_Toc217311882)

[3. Element distribution of dataset 5](#_Toc217311883)

[4. Formation energy distribution of dataset 6](#_Toc217311884)

[5. Feature set for machine learning 7](#_Toc217311885)

[6. Cross validation results of machine learning 9](#_Toc217311886)

[7. Training loss of machine learning model 10](#_Toc217311887)

[8. Heatmap of features 11](#_Toc217311888)

[9. Feature distribution 12](#_Toc217311889)

[10. Electronegativity and covalent radius of elements 13](#_Toc217311890)

[11. Feature selection process 14](#_Toc217311891)

[12. Discussion of the removed features after feature selection 15](#_Toc217311892)

[13. Results of symbolic regression 16](#_Toc217311893)

[14. Error analysis of machine learning 17](#_Toc217311894)

[15. Calculation of convex hull energy 20](#_Toc217311895)

[16. Thermodynamically stable materials 21](#_Toc217311896)

[17. Photoelectronic materials 25](#_Toc217311897)

[18. Partial charge density, projected band structures, and projected DOS 26](#_Toc217311898)

[19. XRD of Ca2GaCoO5 synthesized by using various Co sources 32](#_Toc217311899)

[20. Bright-field (BF) TEM image and EDS spectrum of Ca2GaCoO5 33](#_Toc217311900)

[21. Hyperparameter 34](#_Toc217311901)

[22. Feature construction method 36](#_Toc217311902)

[References 37](#_Toc217311903)

# 1. Octahedral identification method

We employed the local_env module1 in pymatgen2 software package to determine the existence of octahedral local structures. This module provides classes to perform analyses of the local environments of sites in crystals. The identification of octahedral crystals is accomplished through two steps: firstly, employing a bonding analysis method to identify the coordination number of crystal sites, followed by a local structure determination method to calculate the order parameter for the site with a coordination number of 6. This parameter comprehensively considers both the coordination number and bond angles to differentiate whether the coordination number of 6 corresponds to a hexagonal planar (the central atom is coplanar with six coordinating atoms), pentagonal pyramid (Constructed from five triangular planes and one pentagonal plane), or octahedron.1 The bonding analysis identifies the central atom and coordinating atoms of the octahedron, represented respectively as and .

From a total of 204,603 crystals, we successfully identified 17,290 unique octahedral crystals. To manage the computational workload while ensuring high-throughput calculations, we further refined the dataset by selecting 3362 crystals that met specific criteria for containing octahedral local structures.

Supplementary Figure 1: The screening process of machine learning dataset.

# 2. Components and connectivity of dataset


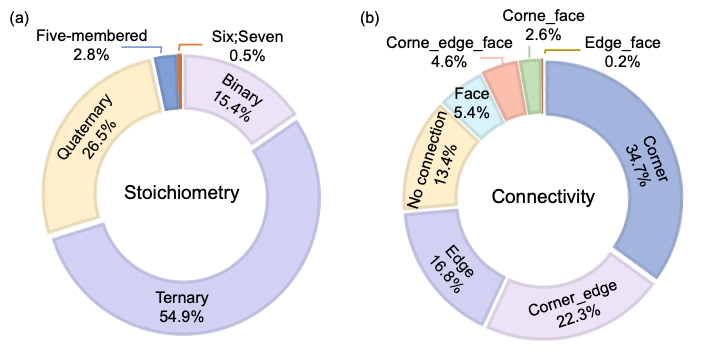


Supplementary Figure 2: The counts of components (a) and connectivity (b) of the crystals in the dataset.

# 3. Element distribution of dataset


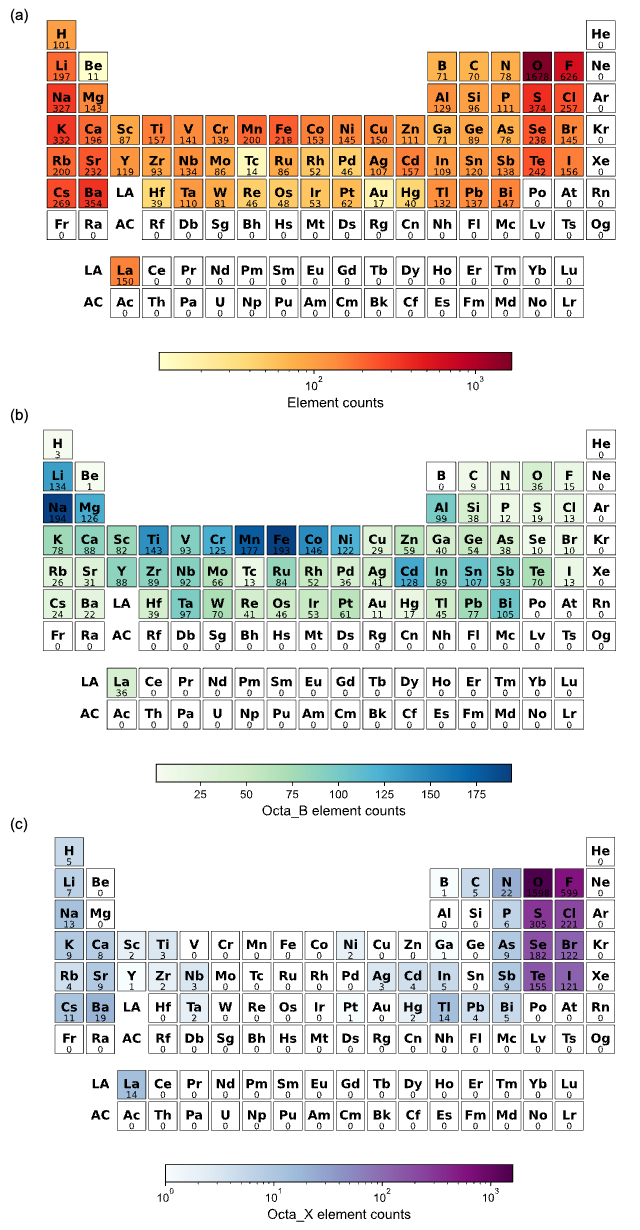


Supplementary Figure 3: The counts of total elements (a), octahedral central element (b), and octahedral coordinate element (c) within the dataset.

# 4. Formation energy distribution of dataset


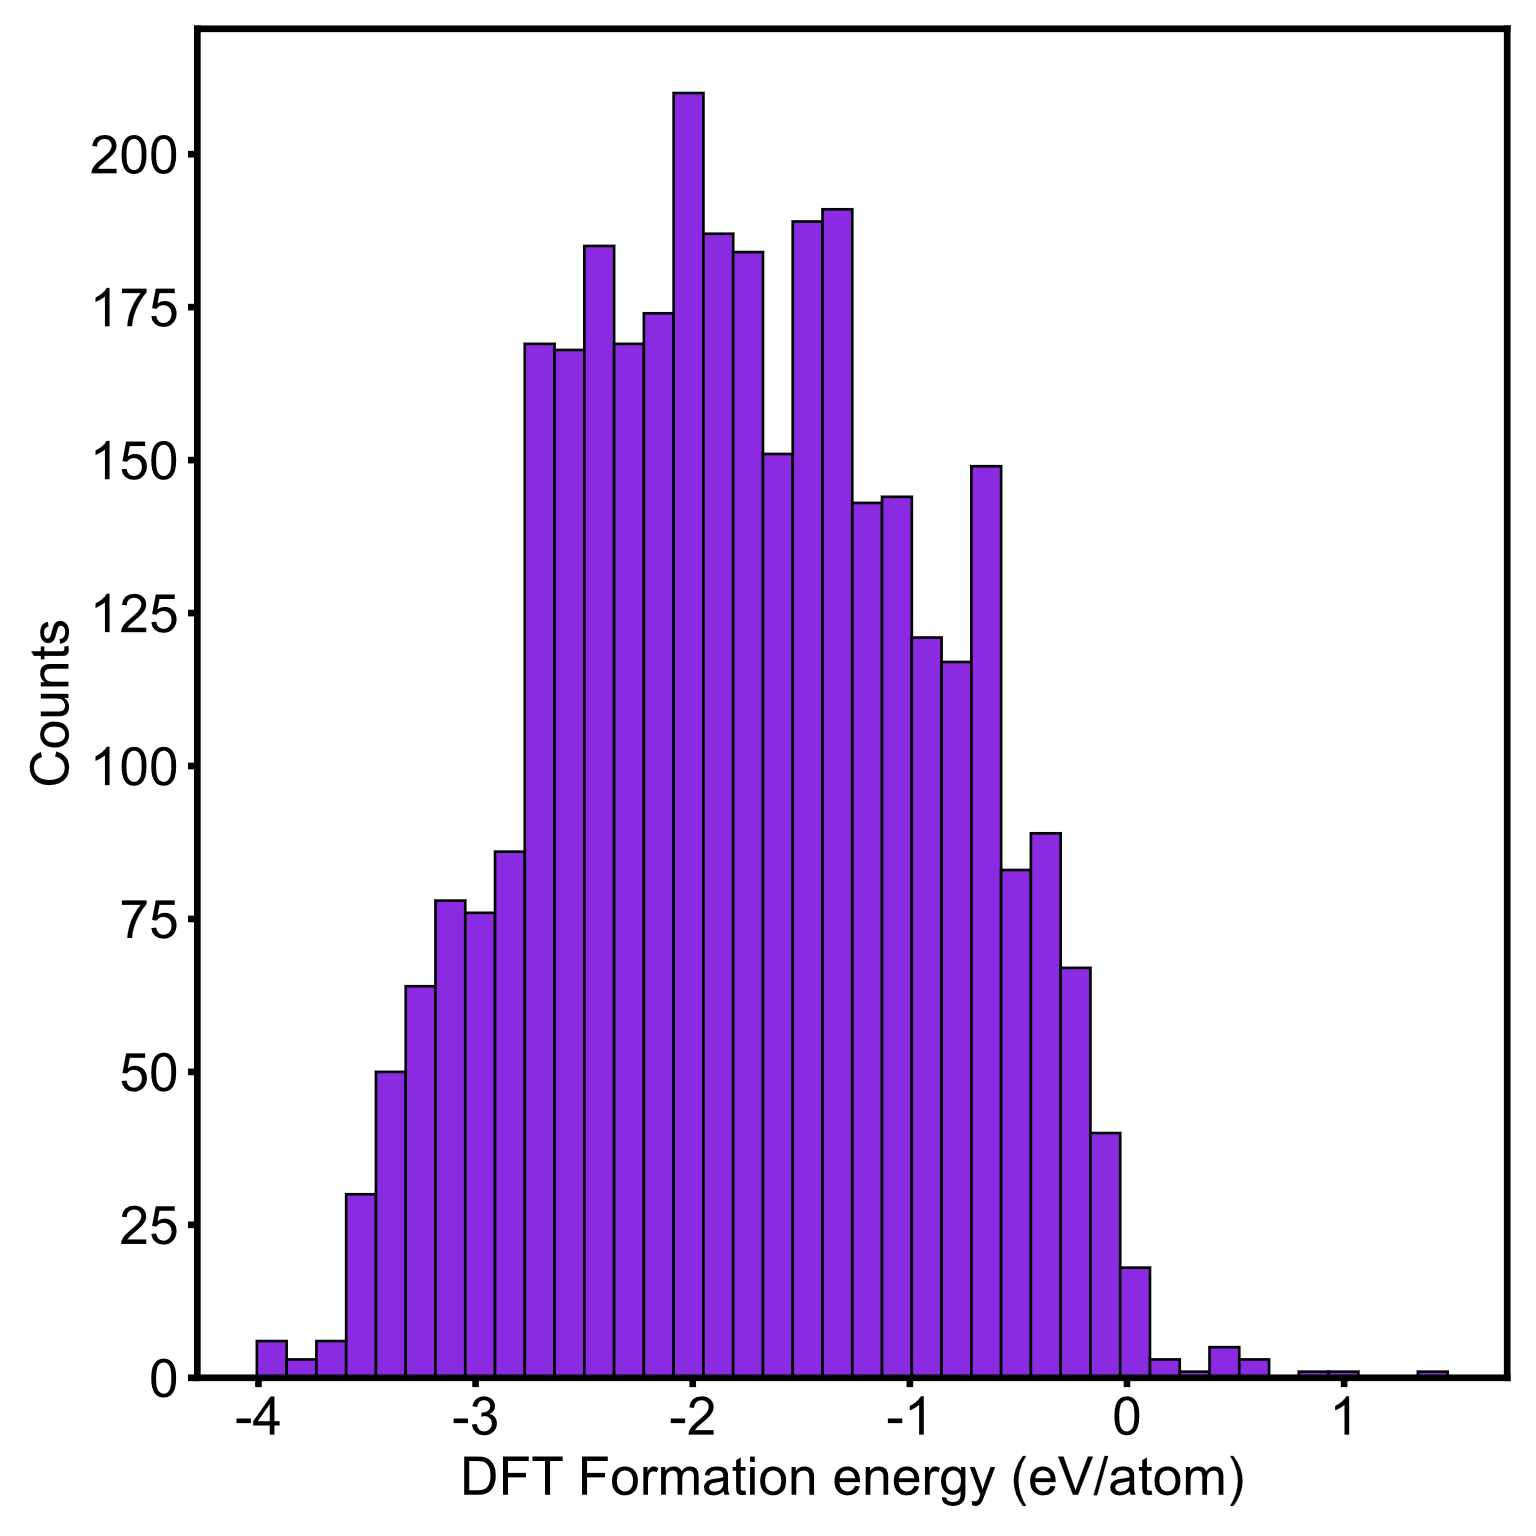


Supplementary Figure 4: The formation energies of crystals in dataset.

| 5. Feature set for machine learning Supplementary Table 1: The features of machine learning model. B represents the central element in octahedra, and X represents the coordinate element in octahedra. | | |
| --- | --- | --- |
| Index of importance | Symbol of features | Description |
| 1 |  | Electronegativity_B/CovalentRadius_B  6×Electronegativity_X/CovalentRadius_X |
| 2 |  | Mean Number of d Valence electron |
| 3 |  | Local Difference in Number of d Valence electron |
| 4 |  | Local Difference in Electronegativity |
| 5 |  | Maximum Ground State bandgap |
| 6 |  | Minimum Electronegativity |
| 7 |  | Electronegativity_B6×Electronegativity_X |
| 8 |  | Mode Electronegativity |
| 9 |  | Maximum Number of d Valence electron |
| 10 |  | Range Number of unfilled Valence electron |
| 11 |  | Range Number of d Valence electron |
| 12 |  | Range Covalence Radius |
| 13 |  | Average deviation Number of unfilled Valence electron |
| 14 |  | Mean Number of unfilled s Valence electron |
| 15 |  | Maximum Number of unfilled d Valence electron |
| 16 |  | Local Difference in Electronegativity of octahedra |
| 17 |  | Mode Ground State volume of |
| 18 |  | Average deviation Ground State bandgap |
| 19 |  | Mean Neighbor Distance Variation |
| 20 |  | Mean Number of Valence electron |
| 21 |  | Mean Number of p Valence electron |
| 22 |  | Local Difference in Ground State bandgap |
| 23 |  | Local difference in CovalentRadius of octahedra |
| 24 |  | Electronegativity_B/ionicRadius_B  6×Electronegativity_X/ionicRadius_X |
| 25 |  | Standard deviation Ewald Energy |
| 26 |  | Electronegativity_B/ionicRadius_B |
| 27 |  | Density of crystal |
| 28 |  | (Electronegativity_B-6×Electronegativity_X)  /(CovalentRadius_B6CovalentRadius_X) |
| 29 |  | Ewald Energy per atom |
| 30 |  | Mean Electronegativity |
| 31 |  | Local Difference in CovalentRadius |
| 32 |  | Octahedra factors (irB/irX) |
| 33 |  | Mean Number of unfilled Valence electron |
| 34 |  | Electronegativity_B/CovalentRadius_B |

# 6. Cross validation results of machine learning


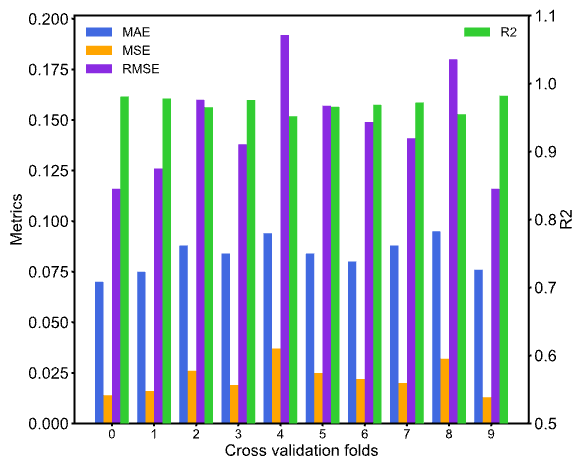


Supplementary Figure 5: 10-fold cross validation results of machine learning.

# 7. Training loss of machine learning model


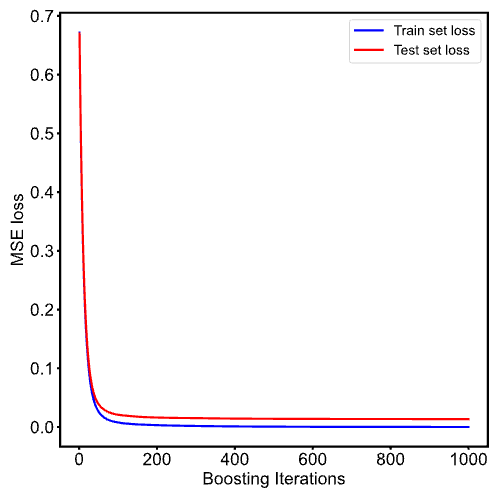


Supplementary Figure 6: MSE loss of machine learning.

# 8. Heatmap of features


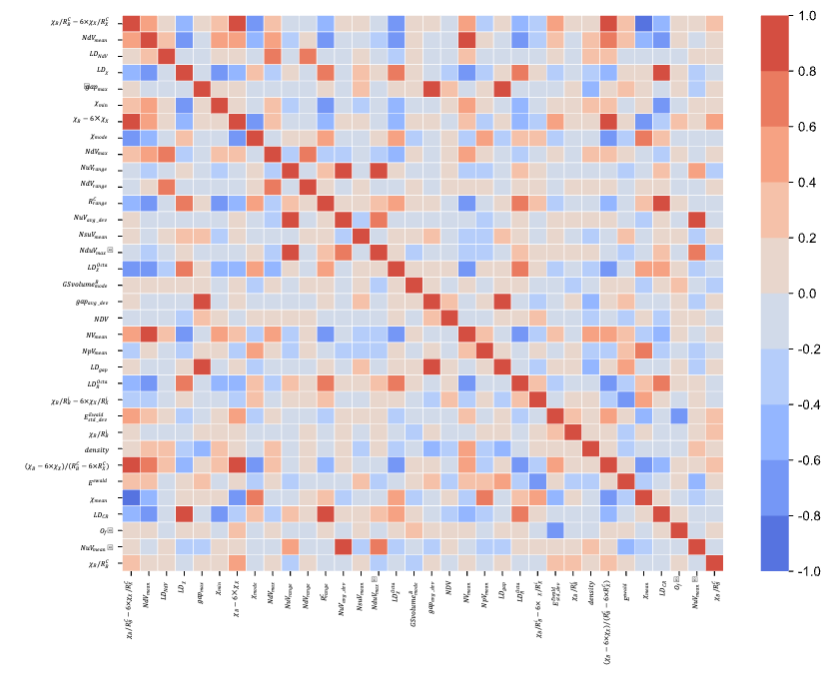


Supplementary Figure 7: The heatmap of feature correlations in machine learning.

# 9. Feature distribution


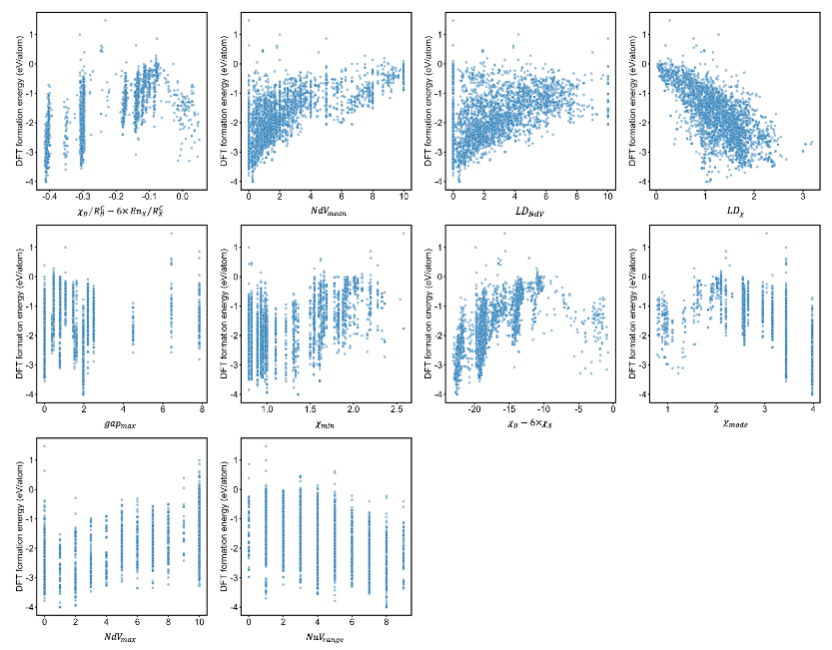


Supplementary Figure 8: Relationship between the top 10 important features and DFT formation energy.

# 10. Electronegativity and covalent radius of elements


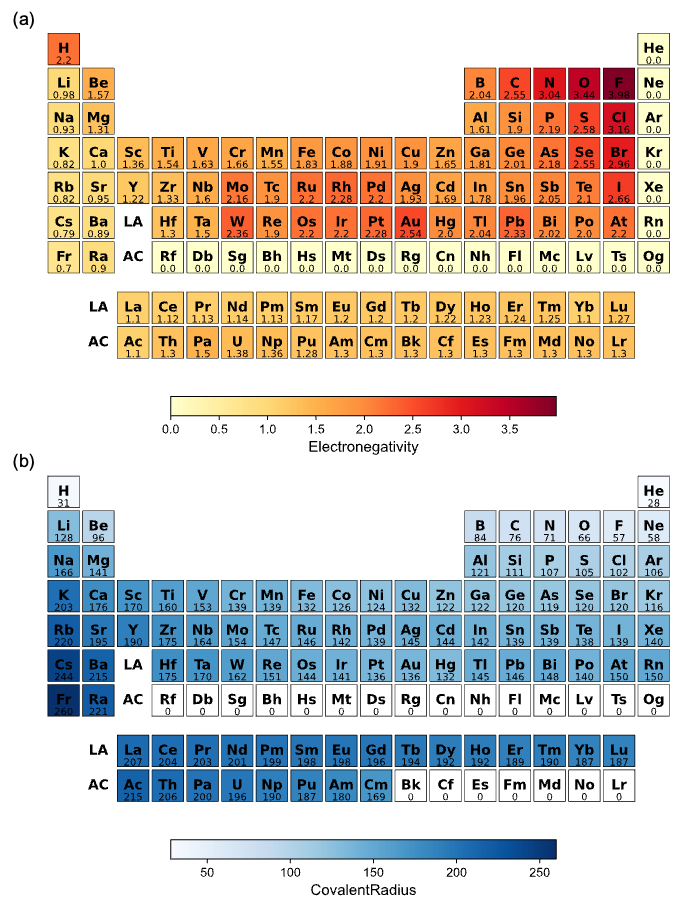


Supplementary Figure 9: The electronegativity (a) and covalent radius (b) of elements.

# 11. Feature selection process


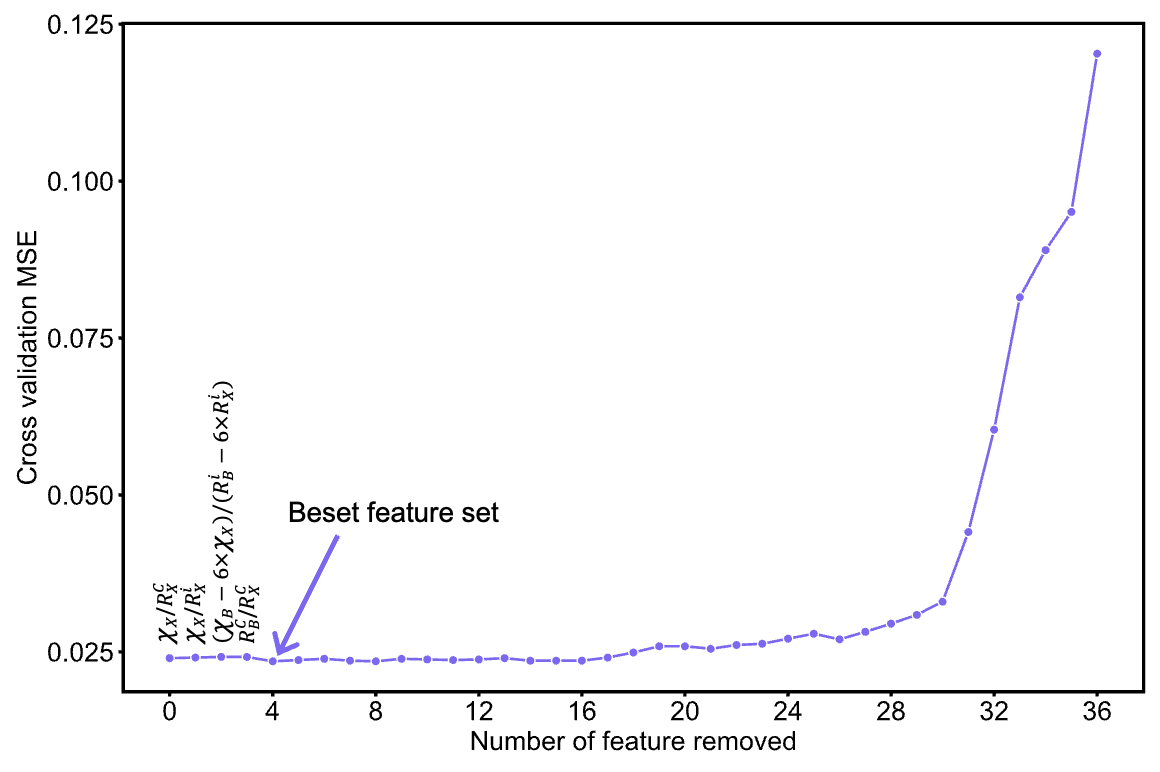


Supplementary Figure 10: The feature selection of machine learning. The minimum MSE is obtained after 4 features are removed. The removed 4 features are /, /, , and /, respectively.

# 12. Discussion of the removed features after feature selection

There are some features commonly used to describe perovskites were excluded due to their lack of significant importance during the feature selection process, such as the bond angle, distortion factor, connectivity, space group number. Octahedra have a fixed coordination, making it ineffective in distinguishing between different octahedral structures as efficiently as bond length. The distortion factors were found to be ineffective due to the rich variety of octahedra in the dataset, where the degree of octahedral distortion appears less significant relative to factors such as element type and atomic distance. Furthermore, we noticed that the connectivity of octahedra was also excluded. It may be attributed to the complexity of octahedral connectivity in crystals, resulting in low information density in this feature. For example, two crystals with the same edge-shared octahedra may exhibit significantly different one-dimensional chain-like structures and two-dimensional layered structures.

Another reason for the exclusion is that some structural features, such as packing fraction, density, and volume per atom have already partly described the arrangement of octahedra in crystals, thus replacing the need for connectivity. We also contend that certain global features, which have been demonstrated to be crucial for perovskites, were discarded due to their low information density and were replaced by other structural features, such as the features employed by Jino Im et al.3, including space group number, crystal system, centrosymmetric, and dimensionality.

#
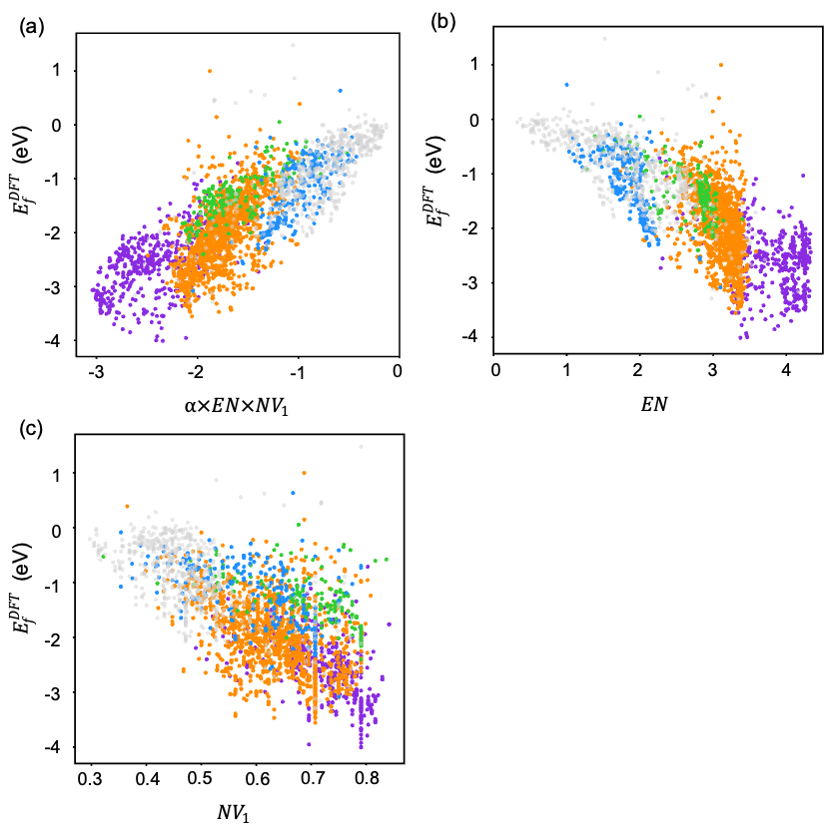
13. Results of symbolic regression

Supplementary Figure 11: Comparation of symbolic regression and DFT calculated formation energies. The color of scatters is same as the legend of Figure 3d.

# 14. Error analysis of machine learning

We considered the potential impact of cell volumes changes resulting from elemental substitutions between parent structures and generative structures. We performed lattice scaling on 691 candidates to bring their cell volumes closer to those obtained after structural relaxation. We employed the ratio of the sum of volumes of all atoms before and after element substitution as the scaling factor. Subsequently, the lattice was scaled using the scale_lattice function in Pymatgen. This approach effectively maintains the packing fraction of the crystal during the element substitution process. Supplementary Figure 12b demonstrates the effectiveness of the lattice scaling, indicating that the scaled crystal volume, when compared to the unscaled crystal, is closer to the volume after structural relaxation. Subsequently, predictions were made based on the scaled crystals. As shown in Supplementary Figure 13a, lattice scaling did not significantly enhance the accuracy of ML predictions (MAE=139 meV/atom). In other words, the ML prediction error does not stem from the change of crystal volume. This is because the ML model primarily relies on elemental features such as electronegativity, covalent radius, and the number of valence electron.

We also investigated the influence of structural relaxation on ML predictions. Supplementary Figure 13b shows that predictions based on relaxed structures are essentially the same as those based on unrelaxed structures (MAE=140 meV/atom).

The above tests demonstrate that the ML model is insensitive to changes in crystal structure, which makes it possible to predict without needing structure relaxation. To further confirm this conclusion, we randomly selected 50% of the 691 candidate materials and calculated their single-point energies without structure relaxation. The comparison between and is shown in Supplementary Figure 14. Clearly, there is a significant discrepancy between them (MAE=232 meV/atom in Supplementary Figure 13b compared to MAE=141 meV/atom in Figure 4c), with the being significantly higher compared to . This is because the calculation of is based on unrelaxed structures. This result further confirms our previous conclusion that ML can give prediction based on unrelaxed structures.


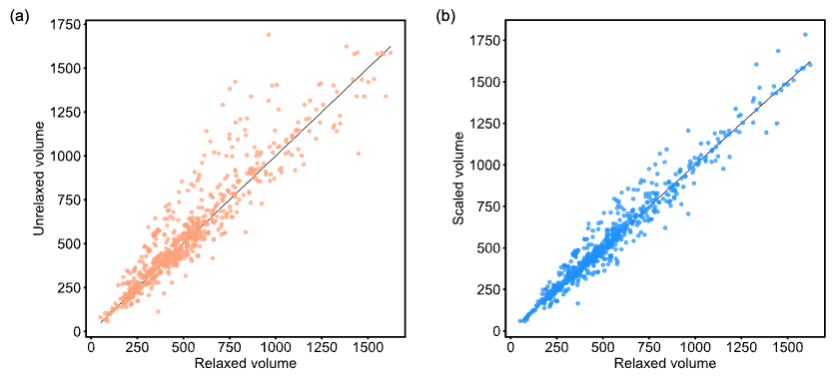


Supplementary Figure 12: (a) The comparison between relaxed volume and unrelaxed volume of crystals. (b) The comparison between relaxed volume and scaled volume of crystals.


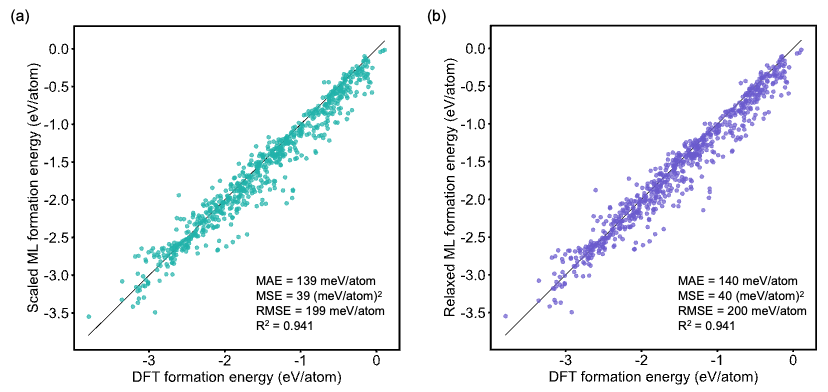


Supplementary Figure 13: (a) The comparison between DFT formation energy and ML predictive formation energy based on volume-scaled crystals. (b) The comparison between DFT formation energy and ML predictive formation energy based on structure-relaxed crystals.

**
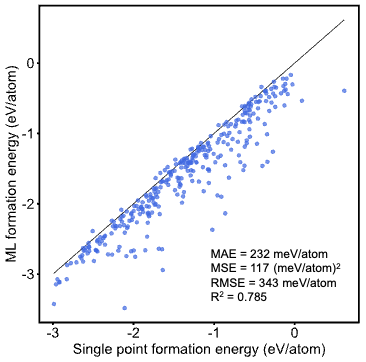
**

Supplementary Figure 14: The comparison between DFT single point formation energy and ML predictive formation energy.

# 15. Calculation of convex hull energy

is defined as the difference between the of a material and of its corresponding competing phases on the convex hull diagram. The compounds located above these lines (>0) are unstable and can decompose into its competing phases. (i.e., the decomposition energy) can be calculated using the following equation (taking CsPbI3 as an example):

Here, , , represent the free energy or formation energies of CsPbI3 and its two corresponding competing phases, respectively.

We calculated their convex hull energies using the PhaseAnalysis module from Jilin Artificial Intelligence-aided Material-design Integrated Package (JAMIP).5 This algorithm involves retrieving the phase space of each material and identifying all possible phases present in OQMD. Subsequently, convex hull diagrams were constructed for each candidate based on its and the of the competing phases. Then could be determined. Through this method, the 691 structures generated a total of 1142 competing phases, with their energies derived from high-throughput DFT calculations.

# 16. Thermodynamically stable materials

| Supplementary Table 2: Information of the 129 thermodynamically stable ( 0 eV/atom) SOMs. and refer to the central element and coordinate element in octahedra. refers to band gap. and refer to the effective transport mass of hole and electron. | | | | | | | | |
| --- | --- | --- | --- | --- | --- | --- | --- | --- |
| Formula | Prototype ICSD-id |  |  | (eV) | Direct (eV) |  |  | Space group |
| Ag2BiCl9Rb4 | ICSD-403158 | Bi | Cl | 3.99 | 4.08 | 2.462 | 0.902 | Pnnm |
| Ag2Br9Rb4Sb | ICSD-403158 | Sb | Br | 3.23 | 3.23 | 2.339 | 0.692 | Pnnm |
| Ag2CoKO8V2 | ICSD-194591 | Co | O | 1.874 | 1.904 | 2.989 | 18.654 | P-3 |
| Ag2CoO8RbV2 | ICSD-194588 | Co | O | 1.942 | 1.959 | 3.496 | 18.173 | P-3 |
| Ag3Fe2O6Sb | ICSD-174288 | Fe/Sb | O | 0.319 | 0.319 | 11.66 | 0.462 | P3_112 |
| AlBaKS3 | ICSD-234998 | K | S | 4.043 | 4.043 | 1.493 | 0.925 | Pnma |
| AlBaNaS3 | ICSD-234999 | Na | S | 3.685 | 3.685 | 0.877 | 0.66 | Pnma |
| AlFeLa3O7 | ICSD-607565 | Fe | O | 2.271 | 2.3 | 5.099 | 3.521 | P6_3 |
| AlHO4Se | ICSD-422882 | Al | O | 5.479 | 5.479 | 1.533 | 2.159 | Pnma |
| AlKO6Se2 | ICSD-250870 | Al | O | 5.451 | 5.518 | 4.067 | 1.448 | Pnma |
| AlLa3RuS7 | ICSD-608317 | Ru | S | 1.485 | 1.61 | 6.115 | 1.218 | P6_3 |
| AlNaO6Se2 | ICSD-250869 | Al | O | 5.122 | 5.123 | 1.999 | 2.472 | Pnma |
| Al2O9Te3 | ICSD-261175 | Al | O | 5.097 | 5.123 | 6.409 | 1.29 | P6_3/m |
| AsCaLiO4 | ICSD-262123 | Li/Ca | O | 5.535 | 5.535 | 4.082 | 0.574 | Pnma |
| AsCdFeHO5 | ICSD-252665 | Fe | O | 0.807 | 0.813 | 17.737 | 0.397 | Pnma |
| AsCoHgO5 | ICSD-131797 | Co | O | 1.436 | 1.442 | 9.03 | 1.12 | Pnma |
| AsK3O3 | ICSD-610764 | K | O | 4.683 | 4.687 | 21.859 | 1.684 | P2_13 |
| AsNa3O3 | ICSD-1036 | Na | O | 4.771 | 4.963 | 10.597 | 1.253 | P2_13 |
| As3FO9Pb5 | ICSD-158900 | F | Pb | 3.609 | 3.616 | 3.728 | 1.058 | P6_3/m |
| BCoO4Pb | ICSD-97665 | Co | O | 1.848 | 1.916 | 3.596 | 1.259 | Pnma |
| BInNi2O5 | ICSD-69616 | In | O | 1.176 | 1.212 | 1.546 | 2.323 | Pbam |
| B2Ca4O25S6 | ICSD-3029 | Ca | O | 7.736 | 7.736 | 82.147 | 0.618 | P-3 |
| B2Cd4O25S6 | ICSD-3026 | Cd | O | 3.708 | 3.708 | 15.838 | 0.676 | P-3 |
| B2K3O6Sc | ICSD-245925 | Sc | O | 3.271 | 3.271 | 2.026 | 0.59 | Pnnm |
| B3FeLaO7 | ICSD-140990 | Fe | O | 2.719 | 2.719 | 11.234 | 1.616 | Cmme |
| B6Ca2K5La3O18 | ICSD-112738 | Ca | O | 3.711 | 3.722 | 5.084 | 0.636 | P31m |
| BaCaLi2O8P2 | ICSD-236294 | Ca | O | 7.312 | 7.312 | 4.463 | 0.517 | P-3 |
| BaCaNa2O8P2 | ICSD-262716 | Ca | O | 6.46 | 6.51 | 7.971 | 0.508 | P-3 |
| BaGaNaS3 | ICSD-235001 | Na | S | 3.439 | 3.439 | 0.812 | 0.619 | Pnma |
| Ba3CaO8Si2 | ICSD-419862 | Ca | O | 6.159 | 6.163 | 8.373 | 0.451 | P-3 |
| Ba5FSb3 | ICSD-199809 | F | Ba | 0.746 | 0.746 | 0.141 | 0.602 | P6_3/mcm |
| Ba6Li2Nb2O17P2 | ICSD-249742 | Nb | O | 3.18 | 3.18 | 3.574 | 1.781 | P-3m1 |
| Ba6N6Re2S | ICSD-419636 | S | Ba | 0.059 | 0.09 | 0.397 | 2.593 | R-3 |
| Be3CdF9K | ICSD-18022 | Cd | F | 5.745 | 5.745 | 8.883 | 0.871 | P-6c2 |
| Be3CdF9Rb | ICSD-23133 | Cd | F | 5.769 | 5.769 | 11.043 | 0.856 | P-6c2 |
| BiCl8F4H3Rb6 | ICSD-39524 | Bi/Rb | Cl | 5.215 | 5.22 | 16.972 | 4.025 | P6_3mc |
| BiCoSe | ICSD-616878 | Co | Se | 0.35 | 0.448 | 0.384 | 1.605 | P2_13 |
| BiCsK2Se3 | ICSD-85412 | Cs | Se | 2.985 | 3 | 6.908 | 5.718 | P2_13 |
| BiCuP2S6 | ICSD-195341 | Bi/Cu | S | 1.461 | 1.591 | 6.463 | 1.204 | P-31c |
| BiFeO4Sb | ICSD-155236 | Fe | O | 1.282 | 1.287 | 4.151 | 1.643 | P-1 |
| BiK2RbS3 | ICSD-85412 | Rb | S | 3.458 | 3.46 | 13.168 | 5.846 | P2_13 |
| BiRb3Te3 | ICSD-300183 | Rb | Te | 2.196 | 2.212 | 4.538 | 3.38 | P2_13 |
| Bi2Br6Cl3Cs3 | ICSD-130352 | Bi | Cl/Br | 3.518 | 3.526 | 1.491 | 0.526 | P-3m1 |
| Bi2Co2Ga2O9 | ICSD-37087 | Co | O | 1.918 | 1.918 | 2.783 | 0.909 | Pbam |
| Bi2Rb2S5Zn | ICSD-267980 | Bi | S | 2.33 | 2.47 | 1.952 | 0.528 | Pnma |
| Bi3F18In | ICSD-421923 | Bi/In | F | 4.024 | 4.024 | 56.231 | 1.055 | P-3c1 |
| BrHg2NaO2 | ICSD-14125 | Br | Hg | 1.654 | 1.825 | 1.957 | 0.511 | C222 |
| Br8Pt3 | ICSD-60761 | Pt | Br | 1.345 | 1.345 | 22.945 | 3.348 | P4_12_12 |
| C2Cl6CoH12KN2 | ICSD-133476 | Co | Cl | 2.124 | 2.211 | 3.983 | 3.822 | P-3 |
| CaClNa2O4V | ICSD-257851 | Cl | Na/Ca | 3.379 | 3.428 | 1.503 | 10.575 | Pnma |
| CaFK2O4V | ICSD-257851 | Ca | F/O | 3.969 | 3.972 | 5.69 | 10.432 | Pnma |
| CaLiO12Re3 | ICSD-101356 | Li | O | 4.038 | 4.039 | 12.282 | 25.843 | P6_3/m |
| CaO9Sr3Ta2 | ICSD-194992 | Ta/Ca | O | 3.435 | 3.592 | 2.282 | 0.825 | P-3m1 |
| Ca2CoGaO5 | ICSD-6320 | Co | O | 2.01 | 2.01 | 1.937 | 0.784 | Pnma |
| Ca3F2O4Si | ICSD-252073 | Ca | F/O | 6.672 | 6.673 | 13.822 | 0.531 | Pnma |
| CdF4Na2 | ICSD-69344 | Cd | F | 3.919 | 3.999 | 10.598 | 0.575 | Pbam |
| CdHI2NaO7 | ICSD-17614 | Cd | O | 3.136 | 3.136 | 3.249 | 0.769 | Pnma |
| ClInRb6Te4 | ICSD-79543 | Cl | Rb | 2.692 | 2.692 | 6.832 | 0.329 | Cmc2_1 |
| Cl11CsV4 | ICSD-26076 | V | Cl | 0.822 | 0.833 | 5.608 | 5.319 | Pmma |
| Cl11RbV4 | ICSD-412126 | V | Cl | 0.808 | 0.841 | 5.532 | 5.013 | Pmma |
| Cl3KRu | ICSD-167455 | Ru | Cl | 1.978 | 2.011 | 3.016 | 6.533 | P6_3cm |
| Cl4KSc | ICSD-402273 | K/Sc | Cl | 4.276 | 4.302 | 7.982 | 22.828 | Pbcn |
| Cl8F4H3K6Sb | ICSD-39524 | Sb/K | Cl | 4.44 | 4.452 | 11.459 | 2.683 | P6_3mc |
| Cl9Cs3Rh2 | ICSD-201057 | Rh | Cl | 2.254 | 2.254 | 18.234 | 3.63 | P6_3/mmc |
| Cl9Nb2Rb5S4 | ICSD-410591 | Rb | Cl | 1.777 | 1.777 | 3.22 | 6.446 | Immm |
| CoFeLa3O7 | ICSD-603954 | Co | O | 0.865 | 0.972 | 5.212 | 6.363 | P6_3 |
| CoKO6Se2 | ICSD-67916 | Co | O | 1.904 | 1.904 | 2.612 | 4.623 | Pnma |
| CoLa3O9W | ICSD-380405 | Co | O | 3.001 | 3.062 | 3.371 | 10.777 | P6_3/m |
| CoNaO6Se2 | ICSD-81559 | Co | O | 2.067 | 2.075 | 3.646 | 5.264 | Pnma |
| CoOSb | ICSD-624859 | Co | O | 0.909 | 0.928 | 1.267 | 1.122 | Pbca |
| Co2H3O9P3 | ICSD-66541 | Co | O | 2.488 | 2.584 | 4.069 | 13.555 | P6_3/m |
| Co2KO3 | ICSD-248051 | Co | O | 0.027 | 0.027 | 1.739 | 0.284 | P-3m1 |
| Co4Cu3LaO12 | ICSD-290761 | Co | O | 0.678 | 0.782 | 4.179 | 1.518 | Im-3 |
| CsCuLa2S4 | ICSD-93680 | La | S | 0.512 | 0.512 | 3.654 | 0.717 | Cmcm |
| CsF5Mo | ICSD-418675 | Mo | F | 0.807 | 0.807 | 9.038 | 41.555 | Pnma |
| CsK2O8P2Y | ICSD-61787 | Y | O | 4.906 | 5.042 | 6.279 | 0.479 | P-3m1 |
| CsS5Y3 | ICSD-433904 | Y | S | 1.933 | 1.933 | 1.612 | 0.628 | Pnma |
| Cs2F5H2InO | ICSD-18929 | In | F/O | 7.129 | 7.136 | 50.719 | 0.603 | Pnma |
| Cs2Ge3O9Zr | ICSD-19030 | Zr | O | 3.634 | 3.778 | 6.191 | 0.48 | P6_3/m |
| Cs2Ge4O9 | ICSD-19031 | Ge | O | 4.262 | 4.424 | 3.901 | 0.382 | P6_3/m |
| Cs3CuMn4O16 | ICSD-424701 | Cu | O | 0.634 | 0.707 | 3.946 | 8.334 | Pnnm |
| Cs3F9Ru2 | ICSD-201057 | Ru | F | 1.528 | 1.528 | 495.445 | 1640.435 | P6_3/mmc |
| Cs3F9Ti2 | ICSD-402407 | Ti | F | 0.752 | 0.763 | 110.133 | 162.919 | P6_3/mmc |
| Cs3F9Tl2 | ICSD-27849 | Tl | F | 5.084 | 5.084 | 40.543 | 0.926 | R-3c |
| Cs5GaP4Se12 | ICSD-50504 | Ga | Se | 1.96 | 1.963 | 2.509 | 0.817 | P4_2/m |
| Cs5InP4S12 | ICSD-50504 | In | S | 3.065 | 3.065 | 4 | 1.381 | P4_2/m |
| Cs5P4S12Sb | ICSD-260946 | Sb | S | 3.086 | 3.145 | 3.254 | 5.574 | P4_2/m |
| Cs5P4SbSe12 | ICSD-260945 | Sb | Se | 2.326 | 2.392 | 2.621 | 0.875 | P4_2/m |
| Cs5P4Se12Tl | ICSD-50504 | Tl | Se | 1.198 | 1.198 | 2.154 | 0.753 | P4_2/m |
| Cs5P5Se12 | ICSD-260945 | P | Se | 2.229 | 2.243 | 4.173 | 0.497 | P4_2/m |
| CuHf2NaS5 | ICSD-98476 | Hf | S | 1.238 | 1.238 | 0.758 | 0.749 | Cmcm |
| FInK6Te4 | ICSD-79543 | F | K | 2.753 | 2.753 | 0.962 | 0.353 | Cmc2_1 |
| FK3MoO4 | ICSD-194783 | F | K | 4.71 | 4.78 | 6.456 | 14.944 | Pnma |
| FNa2O4SrV | ICSD-257851 | F | Sr/Na | 3.992 | 4.046 | 6.273 | 6.471 | Pnma |
| F12S2Si | ICSD-60079 | Si | F | 7.156 | 7.156 | 32.851 | 5.601 | Pnnm |
| F14Ga3K5 | ICSD-248085 | Ga | F | 7.623 | 7.661 | 31.604 | 0.629 | P4/mnc |
| F14N2Pd | ICSD-26397 | Pd | F | 2.195 | 2.197 | 99.165 | 8.589 | I4/m |
| F14N2Rh | ICSD-26397 | Rh | F | 1.33 | 1.33 | 25.365 | 112.053 | I4/m |
| F2O3SeZn2 | ICSD-18869 | Zn | F/O | 4.091 | 4.111 | 5.127 | 2.167 | Pnma |
| F3GaO4Rb2S | ICSD-143627 | Ga | F/O | 6.522 | 6.534 | 132.481 | 0.634 | Pbcn |
| F3H2Li | ICSD-433032 | Li | F | 10.234 | 10.242 | 6.572 | 0.682 | Pnma |
| F4K2O2W | ICSD-201173 | K | F/O | 4.258 | 4.309 | 40.392 | 28.524 | Pbcn |
| F6FeK3Na | ICSD-23182 | Fe | F | 3.104 | 3.11 | 213.805 | 0.633 | R-3m |
| F6H8N2Zr | ICSD-24834 | Zr | F | 6.953 | 6.958 | 16.243 | 0.656 | C2/m |
| F7GaK2Ni | ICSD-408111 | Ni/K/Ga | F | 1.645 | 1.645 | 2.658 | 3.924 | Imma |
| F7InK2Ni | ICSD-72110 | In/K | F | 2.287 | 2.287 | 6.187 | 3.038 | Pnma |
| F7InLi2Ni | ICSD-72110 | In/Li | F | 2.521 | 2.521 | 7.84 | 4.792 | Pnma |
| F8NbOP | ICSD-24086 | Nb | F/O | 5.481 | 5.481 | 902.229 | 1652.884 | Pnma |
| FeGaLa3O7 | ICSD-426674 | Fe | O | 2.298 | 2.298 | 6.192 | 0.773 | P6_3 |
| FeInLa3O7 | ICSD-426492 | Fe | O | 1.946 | 1.952 | 9.363 | 0.528 | P6_3 |
| FeLa4OS6 | ICSD-391306 | Fe | S | 2.193 | 2.195 | 1.872 | 6.606 | P6_3mc |
| GaO8RbW2 | ICSD-24859 | Ga | O | 4.572 | 4.572 | 3.418 | 4.685 | P-3m1 |
| Ga2O7Zn4 | ICSD-247275 | Ga | O | 0.875 | 0.875 | 2.446 | 0.17 | P6_3/mmc |
| GeK2O9Si3 | ICSD-19027 | Ge | O | 5.944 | 6.234 | 3.152 | 0.496 | P6_3/m |
| GeLa3NaS7 | ICSD-112861 | Na | S | 2.055 | 2.239 | 0.576 | 0.895 | P6_3 |
| GeO9Rb2Si3 | ICSD-19028 | Ge | O | 5.936 | 6.248 | 3.164 | 0.484 | P6_3/m |
| Ge3O9Tl2Zr | ICSD-19029 | Zr | O | 3.124 | 3.138 | 1.685 | 1.078 | P6_3/m |
| I4Na2Zn | ICSD-69034 | Na | I | 4.30 | 4.30 | 3.065 | 0.393 | Pnma |
| InNa3O2 | ICSD-202028 | O | Na/In | 2.16 | 2.431 | 2.807 | 0.788 | Pnma |
| KNi2O3 | ICSD-248051 | Ni | O | 1.252 | 1.349 | 8.889 | 2.026 | R-3m |
| K2O5Rb2Te | ICSD-202076 | Rb | O | 3.387 | 3.406 | 118.87 | 0.526 | P4_2/mnm |
| K3O2Tl | ICSD-202028 | O | Tl/K | 2.646 | 2.648 | 3.348 | 1.418 | Pnma |
| Li2S5 | ICSD-38349 | Li | S | 2.525 | 2.528 | 1.639 | 1.171 | Pnma |
| NaPt2S3 | ICSD-78788 | Pt | S | 1.464 | 1.494 | 4.179 | 0.65 | P6_3mc |
| Na3O4Rb2Tl | ICSD-61402 | Rb | O | 2.608 | 2.608 | 6.861 | 0.391 | Pnnm |
| O6PbSiTe | ICSD-254193 | Si/Pb/Te | O | 3.321 | 3.556 | 0.748 | 0.495 | P312 |
| O6RbScTe2 | ICSD-291296 | Sc | O | 3.021 | 3.021 | 1.788 | 2.124 | Pnma |
| O9Rb2Si3Zr | ICSD-19026 | Zr | O | 4.761 | 4.973 | 5.7 | 0.475 | P6_3/m |
| Rb3SbTe3 | ICSD-300182 | Rb | Te | 2.425 | 2.435 | 7.476 | 7.284 | P2_13 |

# 17. Photoelectronic materials

| Supplementary Table 3. The DFT calculation results of 19 selected new octahedral crystals. | | | | | | | |
| --- | --- | --- | --- | --- | --- | --- | --- |
| Octahedral  crystals | Dimension |  |  | DFT+U/HSE  (eV) | Direct  (eV) | Reduced  effective mass | Optical  absorption |
| KCo2O3 | 3D | Co | O | 0.03 | 0.03 | 0.24 | 1509.17 |
| N6Re2SBa6 | 3D | S | Ba | 0.06 | 0.09 | 0.34 | 2300.65 |
| Zn4Ga2O7 | 3D | Ga | O | 0.87 | 0.87 | 0.16 | 1193.91 |
| CoOSb | 3D | O | Co, Sb | 0.91 | 0.91 | 0.59 | 1162.85 |
| Ca2GaCoO5 | 3D | Co | O | 2.01 | 2.01 | 0.56 | 1422.81 |
| Pt2NaS3 | 2D | Pt | S, Na | 1.46 | 1.49 | 0.56 | 2124.06 |
| O2InNa3 | 3D | O | Na, In | 2.16 | 2.43 | 0.62 | 2868.41 |
| Cs5P5Se12 | 0D | P | Se | 2.23 | 2.24 | 0.44 | 1155.66 |
| ZnRb2Bi2S5 | 2D | Bi | S | 2.33 | 2.47 | 0.42 | 1299.26 |
| Cs5P4SbSe12 | 0D | Sb | Se | 2.33 | 2.39 | 0.66 | 1038.47 |
| TlNa3Rb2O4 | 3D | Rb | O | 2.61 | 2.61 | 0.37 | 1157.53 |
| O2TlK3 | 3D | O | Tl, K | 2.65 | 2.65 | 0.99 | 1767.37 |
| InFK6Te4 | 3D | K | Te | 2.75 | 2.75 | 0.26 | 1164.75 |
| RbTe2ScO6 | 3D | Sc | O | 3.02 | 3.02 | 0.97 | 1086.86 |
| Ge3Tl2ZrO9 | 3D | Zr | O | 3.12 | 3.14 | 0.66 | 1080.85 |
| Ag2Rb4SbBr9 | 2D | Sb | Br | 3.23 | 3.23 | 0.53 | 1345.74 |
| Ag2Rb4BiCl9 | 2D | Bi | Cl | 3.99 | 4.08 | 0.66 | 1272.25 |
| ZnNa2I4 | 3D | Na | I | 4.30 | 4.30 | 0.35 | 1124.24 |
| HSeAlO4 | 2D | Al | O | 5.48 | 5.48 | 0.90 | 1241.95 |

# 18. Partial charge density, projected band structures, and projected DOS


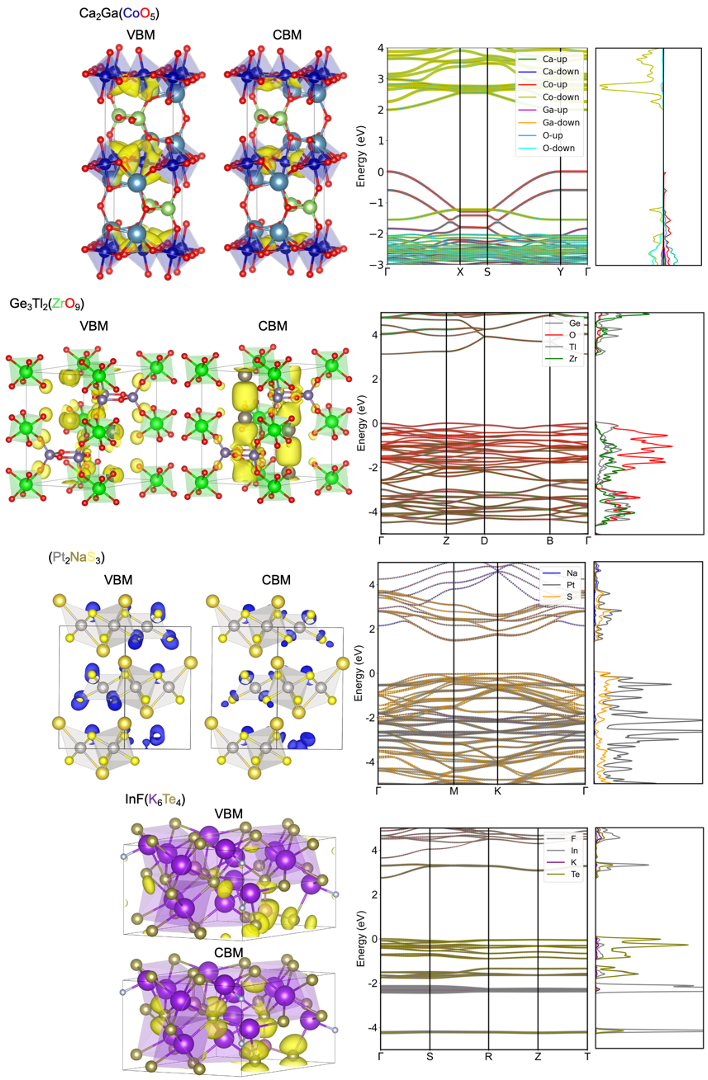


**
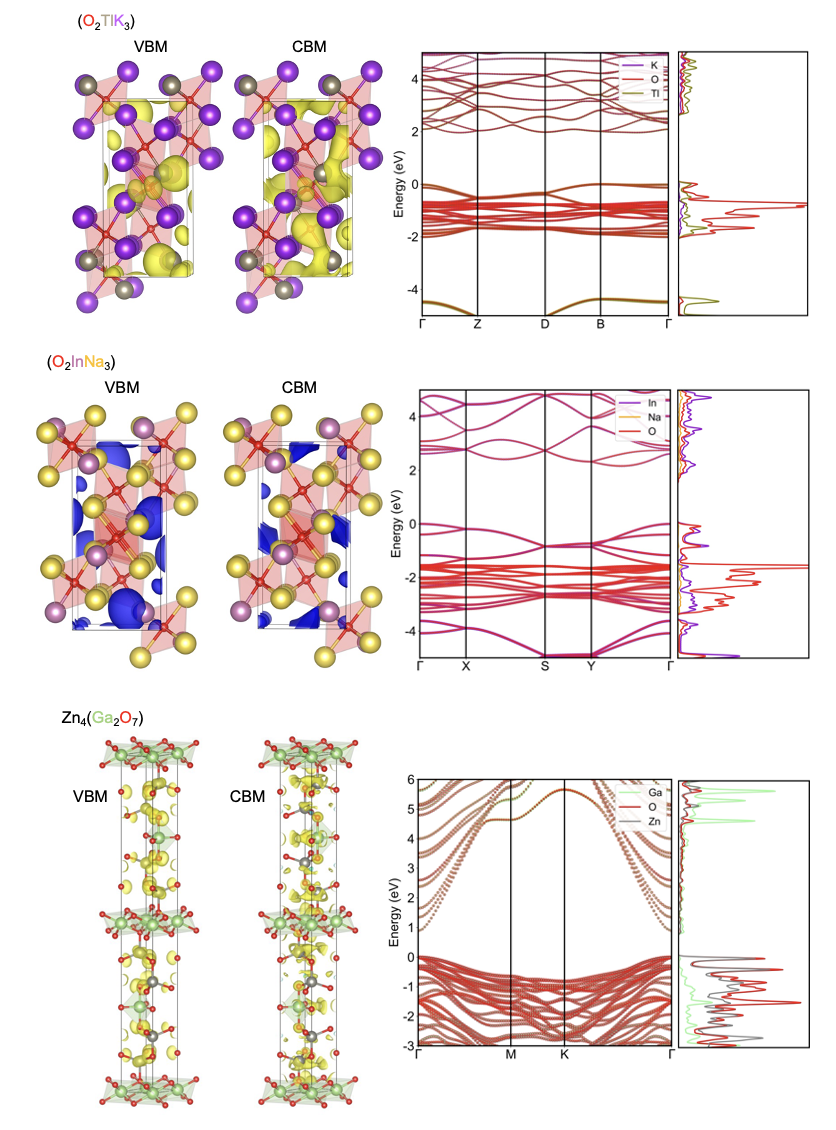
**


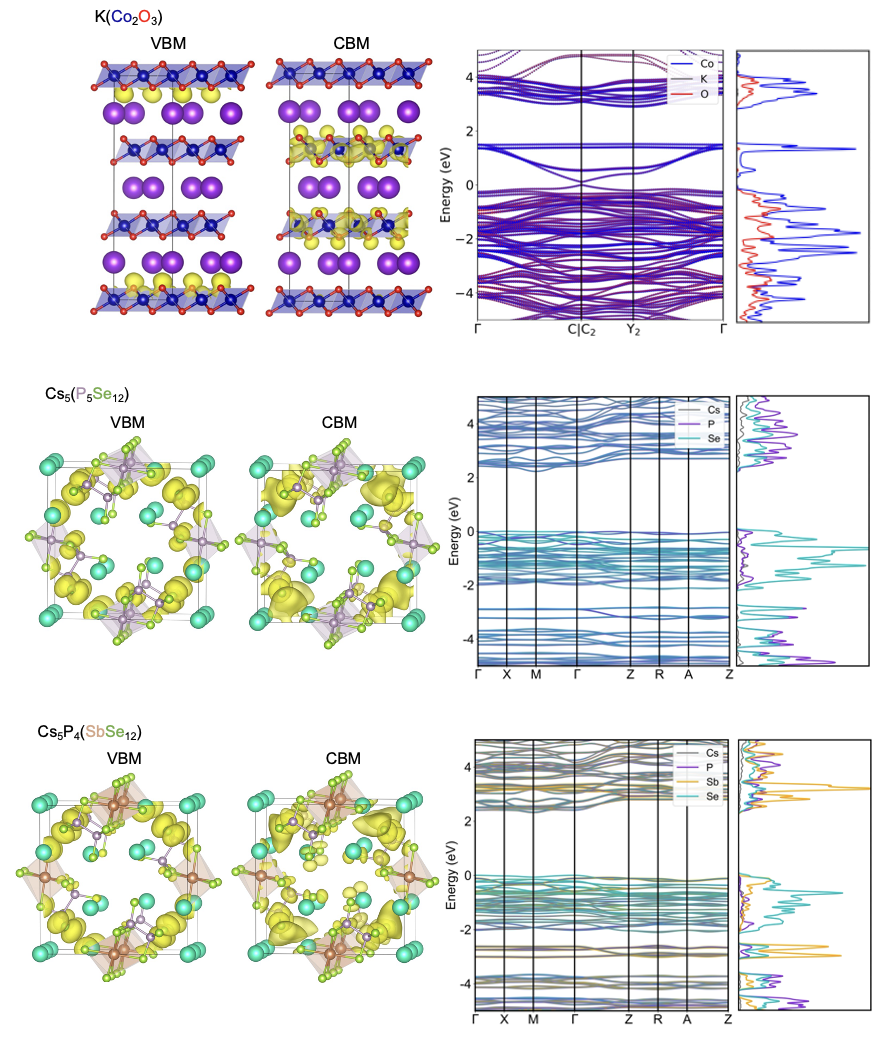


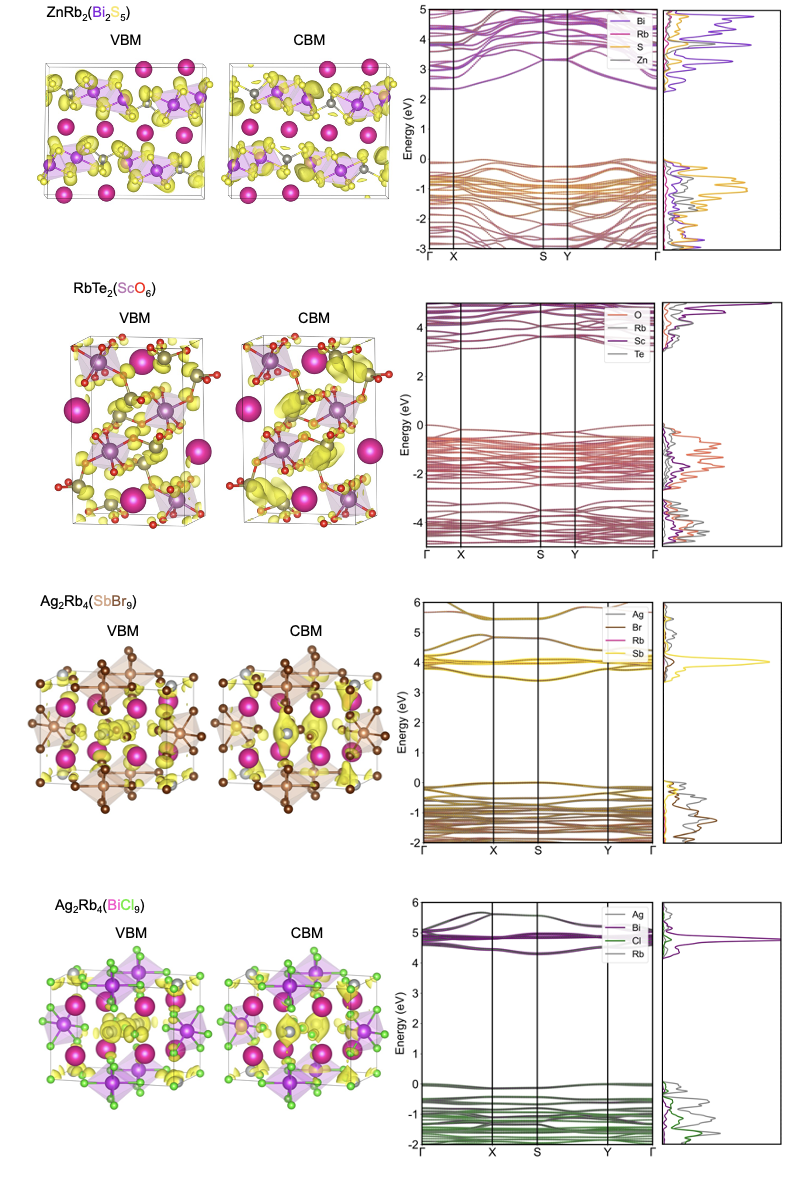


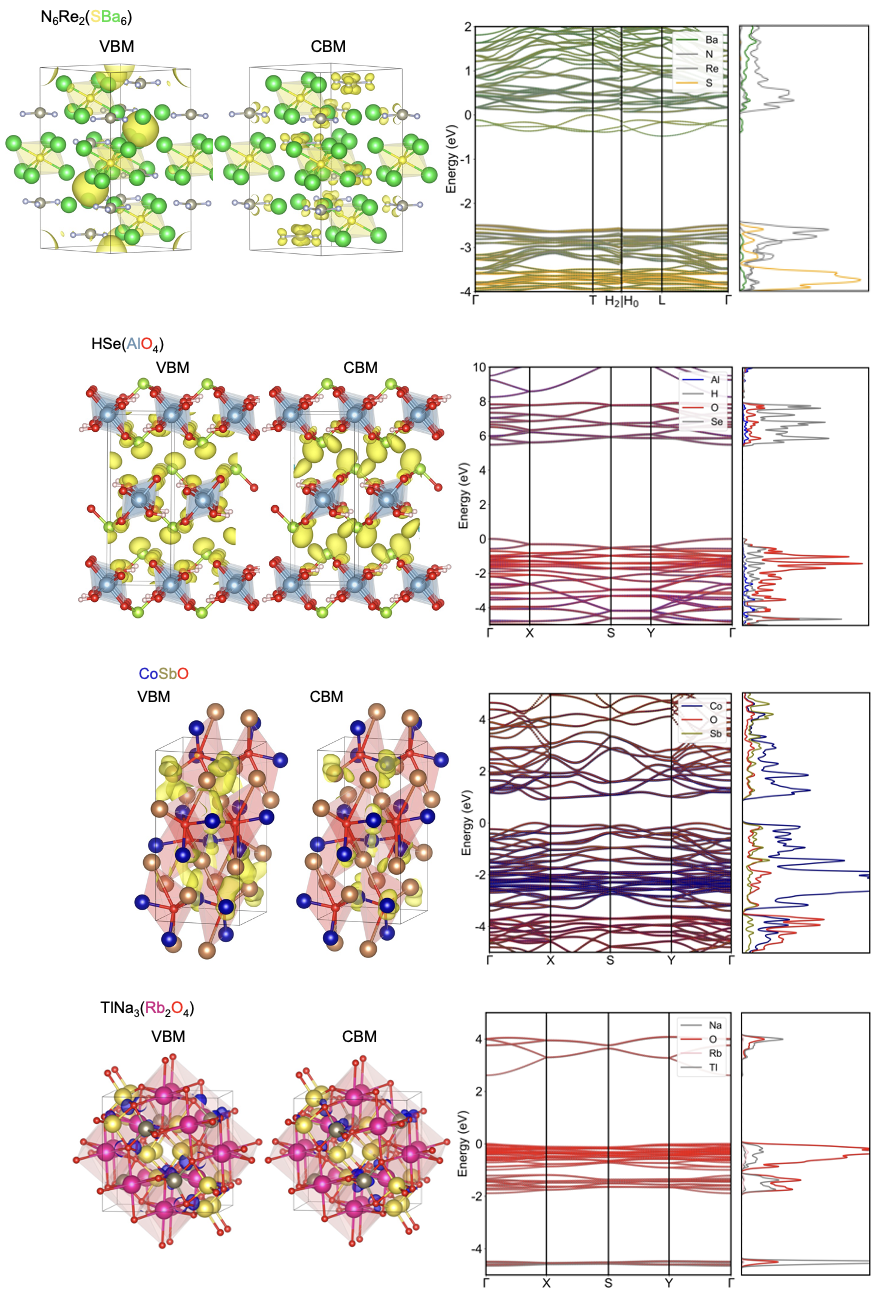


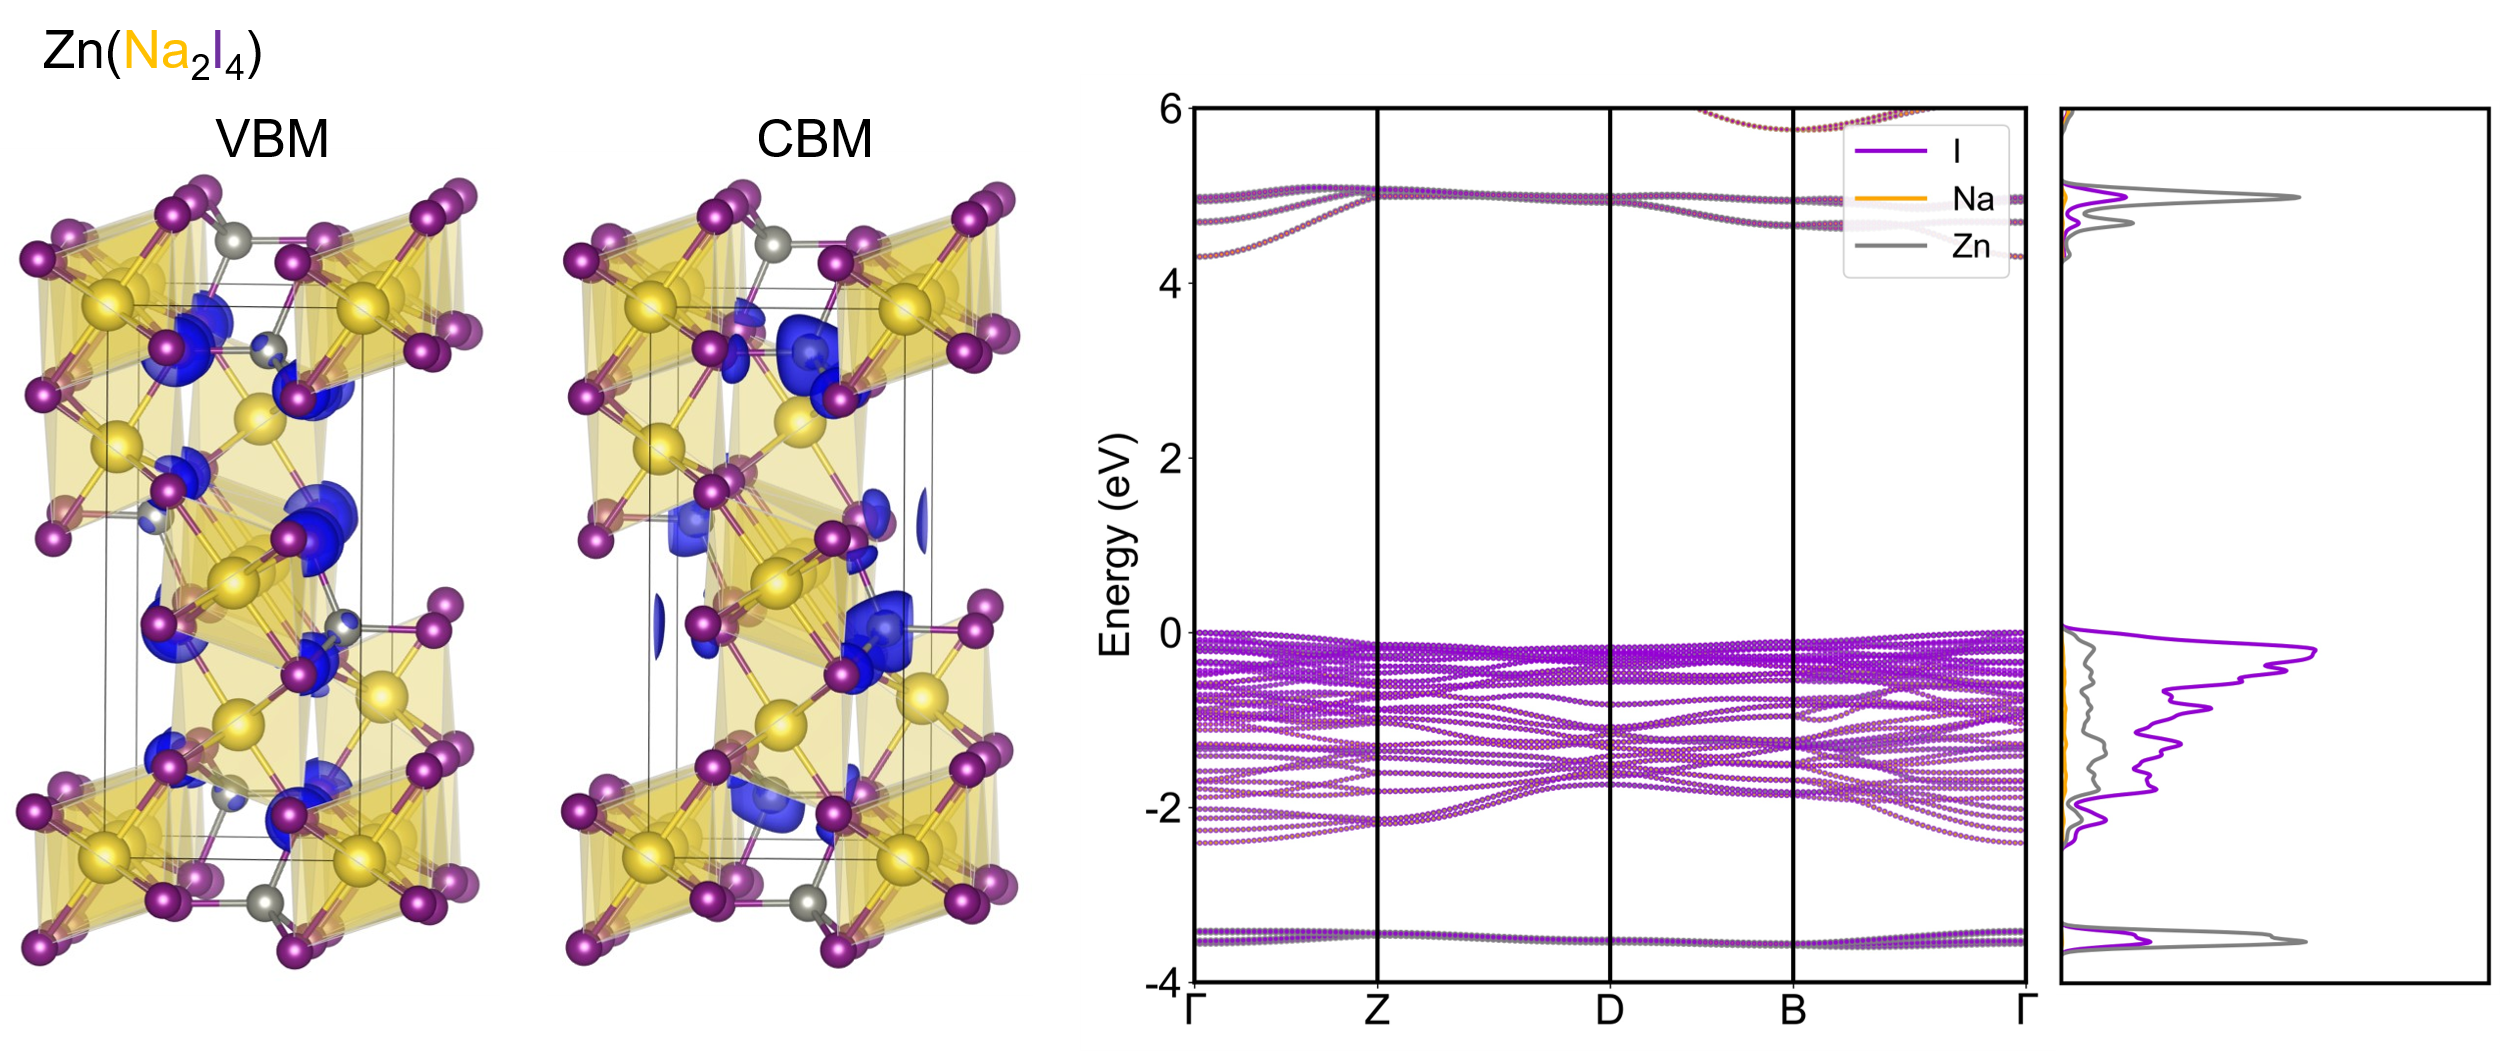


Supplementary Figure 15: Partial charge density, projected band structures, and projected density of states (pDOS) of the 19 new optoelectronic materials. Charge is displayed in orange or blue. Isosurface level is set to be 2e-7. The pDOS is divided by the number of atoms of each element for better visualization of each element's contribution. Octahedral compositions are given in parentheses.

#
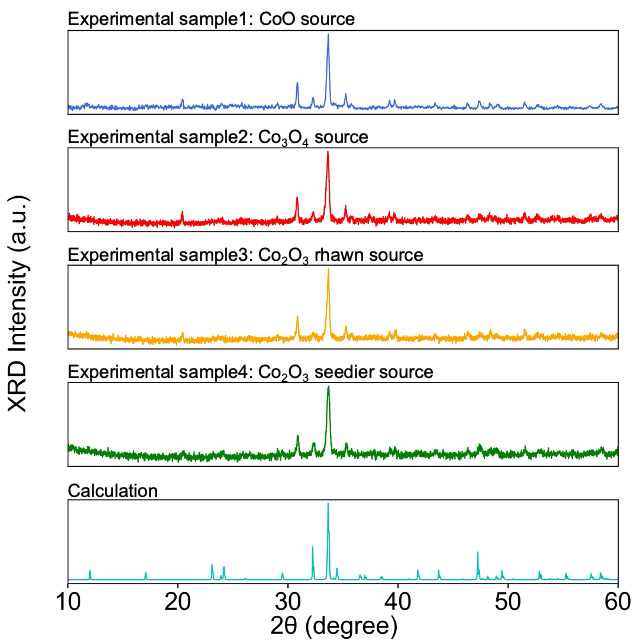
19. XRD of Ca2GaCoO5 synthesized by using various Co sources

Supplementary Figure 16. XRD of Ca2GaCoO5 synthesized by using various Co sources. Experimental sample1 was synthesized by using CoO source. Experimental sample2 was synthesized by using Co3O4 source. Experimental sample3 was synthesized by using Co2O3 produced by Rhawn Company. Experimental sample4 was synthesized by using Co2O3 produced by Seedior Company.

#
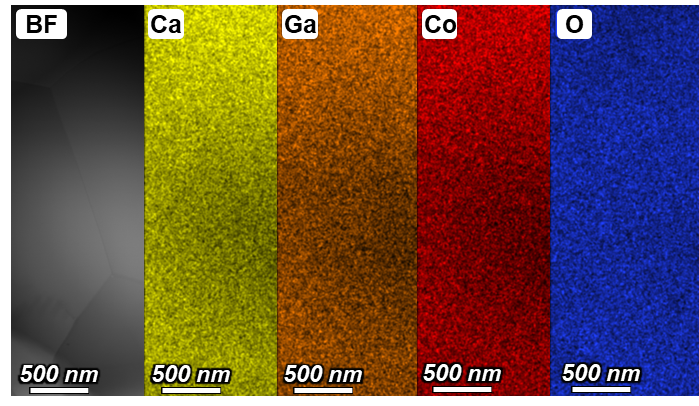
20. Bright-field (BF) TEM image and EDS spectrum of Ca2GaCoO5

Supplementary Figure 17. Bright-field (BF) TEM image and EDS spectrum of Ca2GaCoO5

# 21. Hyperparameter

The most critical hyperparameters in GBRT are maximum depth and learning rate. The max_depth parameter defines the maximum depth of the decision tree, that is, the length of the longest path that the decision tree can generate. It limits the maximum path length from the root node to the farthest leaf node. While The learning_rate determines how much a weak learner added to the model contributes to the final prediction at each iteration. We employed the grid search by method GridSearchCV in Scikit-learn6 to identify the optimal combination of the two hyperparameters.

| Supplementary Table 4: The combination of hyperparameter and results of hyperparameter search. | |
| --- | --- |
| Hyperparameters | Results |
| max depth = 3, learning_rate = 0.01 | MSE = 0.0538 |
| max depth = 4, learning_rate = 0.01 | MSE = 0.0432 |
| max depth = 5, learning_rate = 0.01 | MSE = 0.0387 |
| max depth = 6, learning_rate = 0.01 | MSE = 0.0361 |
| max depth = 7, learning_rate = 0.01 | MSE = 0.0383 |
| max depth = 8, learning_rate = 0.01 | MSE = 0.0411 |
| max depth = 3, learning_rate = 0.05 | MSE = 0.0336 |
| max depth = 4, learning_rate = 0.05 | MSE = 0.0315 |
| max depth = 5, learning_rate = 0.05 | MSE = 0.0315 |
| max depth = 6, learning_rate = 0.05 | MSE = 0.0223 |
| max depth = 7, learning_rate = 0.05 | MSE = 0.0357 |
| max depth = 8, learning_rate = 0.05 | MSE = 0.0401 |
| max depth = 3, learning_rate = 0.1 | MSE = 0.0280 |
| max depth = 4, learning_rate = 0.1 | MSE = 0.0322 |
| max depth = 5, learning_rate = 0.1 | MSE = 0.0319 |
| max depth = 6, learning_rate = 0.1 | MSE = 0.0335 |
| max depth = 7, learning_rate = 0.1 | MSE = 0.0366 |
| max depth = 8, learning_rate = 0.1 | MSE = 0.0412 |

| Supplementary Table 5: Hyperparameters of machine learning model. | |
| --- | --- |
| Hyperparameter | Value |
| n_estimators | 1000 |
| max_depth | 6 |
| learning_rate | 0.05 |
| loss | squared_error |
| min_samples_split | 2 |
| min_samples_leaf | 1 |

| Supplementary Table 6: Hyperparameters of symbolic regression (SISSO). | |
| --- | --- |
| Hyperparameter | Value |
| desc_dim | 2 |
| nsf | 34 |
| fcomplexity | 5 |
| fmax_min | 1e-5 |
| fmax_max | 1e5 |
| nf_sis | 100 |
| method_so | 'L0' |
| fit_intercept | .true. |
| metric | RMSE |

# 22. Feature construction method

The features used in machine learning were extracted using the Matminer,7 pymatgen,2 and Mendeleev software packages.8

We also used the SiteAnalyzer module in Robocrystallographer package9 to describe the connectivity of octahedra, which was regarded as the semi-local environment of crystals. When there exist one, two, or multiple shared atoms between two adjacent atoms, the connection between these two octahedra is categorized as corner, edge, or face shared. When both corner and edge connections coexist in a crystal, we classify the connectivity as corner+edge. Thus, we categorize the connection modes into eight types, they are corner, edge, face, corner+edge, corner+face, edge+face, corner+edge_face and no connection. We adopted three types of categorical encoding methods for connectivity: label encoding, binary encoding, and one-hot encoding.

Due to lack consistent structure in our dataset, coupled with variations in the types of elements across different crystals, it is indispensable to employ numerical statistical methods to uniform the feature lengths for each sample before model training. The commonly adopted approach for perovskite materials is calculating the average value.10–13 Relying solely on the average may obscure material characteristics and limit the comprehensive capture of material information for various octahedra in our dataset, thereby hindering the training of ML models. To ensure a comprehensive representation of crystal information, we incorporated multiple numerical statistical methods for feature unification, including maximum (), minimum (), mean, range, mode, average deviation (), and standard deviation (). By leveraging these diverse statistical measures, we aim to capture a more complete and nuanced understanding of the materials' properties and facilitate effective training of the ML models.

# References

1. Zimmermann, N. E. R. & Jain, A. Local structure order parameters and site fingerprints for quantification of coordination environment and crystal structure similarity. *RSC Adv.* **10**, 6063–6081 (2020).

2. Ong, S. P. *et al.* Python Materials Genomics (pymatgen): A robust, open-source python library for materials analysis. *Comput. Mater. Sci* **68**, 314–319 (2013).

3. Im, J. *et al.* Identifying Pb-free perovskites for solar cells by machine learning. *npj. Comput. Mater.* **5**, 37 (2019).

4. Ward, L. *et al.* Including crystal structure attributes in machine learning models of formation energies via Voronoi tessellations. *Phys. Rev. B* **96**, 024104 (2017).

5. Zhao, X.-G. *et al.* JAMIP: an artificial-intelligence aided data-driven infrastructure for computational materials informatics. *Sci. Bull.* **66**, 1973–1985 (2021).

6. Pedregosa, F. Scikit-learn: Machine learning in python. *J. Mach. Learn. Res.* **12**, 2825–2830 (2011).

7. Ward, L. *et al.* Matminer: An open source toolkit for materials data mining. *Comput. Mater. Sci* **152**, 60–69 (2018).

8. Mentel, L. M. mendeleev - A Python package with properties of chemical elements, ions, isotopes and methods to manipulate and visualize periodic table. (2021).

9. Ganose, A. M. & Jain, A. Robocrystallographer: automated crystal structure text descriptions and analysis. *MRS Commun.* **9**, 874–881 (2019).

10. Chen, J., Xu, W. & Zhang, R. Δ-Machine learning-driven discovery of double hybrid organic–inorganic perovskites. *J. Mater. Chem. A* **10**, 1402–1413 (2022).

11. Hu, W., Zhang, L. & Pan, Z. Designing two-dimensional halide perovskites based on high-throughput calculations and machine learning. *ACS Appl. Mater. Interfaces* **14**, 21596–21604 (2022).

12. Ma, X.-Y., Lewis, J. P., Yan, Q.-B. & Su, G. Accelerated discovery of two-dimensional optoelectronic octahedral oxyhalides via high-throughput *Ab Initio* calculations and machine learning. *J. Phys. Chem. Lett.* **10**, 6734–6740 (2019).

13. Kim, J. & Min, K. Data‐driven investigation of the synthesizability and bandgap of double perovskite halides. *Adv. Theor. Simul.* **5**, 2200068 (2022).
